# Supplementary material for: Dislocation “Bubble-Like-Effect” and the Ambient Temperature Super-plastic Elongation of Body-centred Cubic Single Crystalline Molybdenum
Source: PubMed Central journal article supplement (PMC4783708; doi:10.1038/srep22937), 2016-03-09
Supplement: srep22937-s1.pdf [file srep22937-s1.pdf]

**Supplementary Information for:**

**Dislocation “Bubble-Like-Effect” and the Ambient Temperature Super-plastic Elongation of Body-centred Cubic Single Crystalline Molybdenum**

Yan Lu<sup>1</sup>, Sisi Xiang<sup>1</sup>, Lirong Xiao<sup>1</sup>, Lihua Wang<sup>1,\*</sup>, Qingsong Deng<sup>1</sup>, Ze Zhang<sup>1,2</sup>,  
Xiaodong Han<sup>1,\*</sup>

<sup>1</sup> Institute of Microstructure and Properties of Advanced Materials, Beijing University of Technology, Beijing, 100124, China

<sup>2</sup> Department of Materials Science, State Key Lab of Si Materials, Zhejiang University, Hangzhou, Zhejiang, 310027, China

Corresponding author: [wlh@bjut.edu.cn](mailto:wlh@bjut.edu.cn); [xdhan@bjut.edu.cn](mailto:xdhan@bjut.edu.cn)

**Super-plastic elongation of single crystal Mo nanowire.** The plastic strain measurement exclude the necking region. The nanowire with 300 nm in diameter and aspect ratio of ~2:1 is demonstrated in Fig. S1. The *in situ* TEM images of single crystalline Mo nanowire with 136 nm and 243 nm in diameter are shown in Fig. S2 and Fig. S3, respectively.

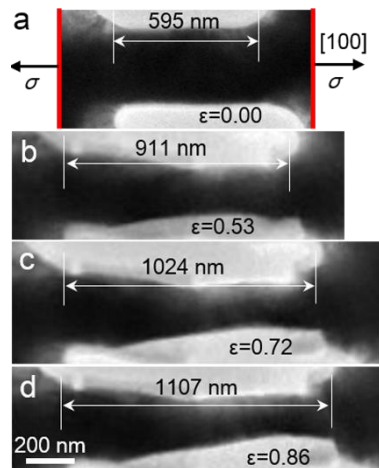

Figure S1. A series of bright-field TEM images of a nanowire with an aspect ratio of ~2:1. The nanowire is with an initial width of ~300 nm and a length of 595 nm. The elongation is ~86% before fracture.

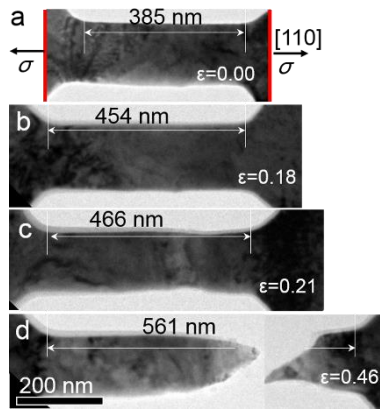

Figure S2. The *in situ* tensile progress of Mo nanowire that is 136 nm in diameter and 385 nm in initial length with aspect ratio of  $\sim 3:1$ . The final length of nanowire is measured to be 561 nm; the plastic elongation is 46%.

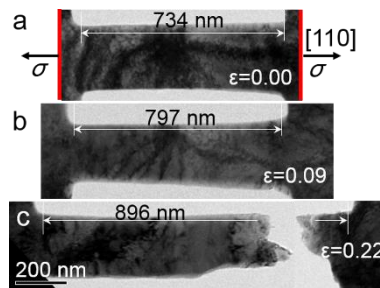

Figure S3. The *in situ* TEM images of a nanowire with 243 nm in diameter, 734 nm in initial length and aspect ratio of  $\sim 3:1$ . The final length excluding necking region is 896 nm; the plastic elongation is 22%.
